# Supplementary material for: Mixed Communities of Mucoid and Nonmucoid Pseudomonas aeruginosa Exhibit Enhanced Resistance to Host Antimicrobials
Source: PubMed Central journal article supplement (PMC5874919; doi:10.1128/mbio.00275-18), 2018-03-27
Supplement: mbo002183774s1.pdf [file mbo002183774s1.pdf]

## **Supplemental Materials and Methods**

**Alginate purification and quantitation.** Clinical mucoid isolate, FRD1, was grown on PIA at 37° C for 16-18 hours. Colonies were scraped directly from the solid medium and homogenized in 0.85% saline. After vortexing the bacterial suspension, cells were pelleted by centrifugation at 21,952xg for 30 minutes at room temperature. Alginate was precipitated from the supernatant with 2% cetyl pyridinium chloride and centrifuged at 21,952xg for 10min at room temperature. The pellet was dissolved in cold 100% isopropanol and centrifuged at 21,952xg for 10min at room temperature. The alginate pellet was rehydrated in saline and incubated 12-24h at 4°C.

Purified alginate preparations were quantitated as follows: Brown algae-derived (seaweed) alginate (Sigma) was dissolved in saline and diluted two-fold (2mg/mL to 62.5mg/mL) to generate standards. Alginate standards or sample were placed in duplicate into a 96-well plate. 25 mM sodium tetraborate in sulfuric acid was added to each well, followed by heating on a standard heatblock at 100°C for 15 minutes. 0.1% carbazole was then added into each well, followed by heating at 100°C for 15 minutes. After cooling the plate to room temperature, absorbance was read on a Spectramax plate reader at wavelength of 550nm.

**Quantitative reverse transcriptase-PCR.** Bacterial strains were grown to exponential phase ( $OD_{600} \approx 1.0$ ). Bacterial cells were pelleted by centrifugation, and resuspended/lysed in TRIzol for 5 minutes. Chloroform was added and the aqueous phase was collected and applied to the genomic DNA eliminator column provided in the Qiagen RNeasy Kit. The column was centrifuged at 8000 x g for 30 seconds at 4°C. RNA was purified following manufacturer's instructions. RNA was eluted with 50uL RNase-free water.

The RNA preparations were converted to cDNA using the Thermo SuperScript III First-Strand Synthesis System, per manufacturer's instructions. Quantitative real time PCR was

performed using Bio-Rad CFX1000 thermal cycler, gene-specific primer pairs, and SYBR green supermix (Biorad). All samples were normalized to housekeeping gene *rpoD* and mRNA transcript fold-change was calculated relative to FRD1.

**Catalase activity assays.** Supernatants from bacteria were diluted 1:4 in assay buffer and added to a 96 well plate to a final volume of 78 $\mu$ L. The negative control was LBNS. A H<sub>2</sub>O<sub>2</sub> standard curve was generated (0, 2, 4, 6, 8, and 10 nmol) to a final volume of 78 $\mu$ L. 10 $\mu$ L of stop solution was added into the wells containing the standards. One additional well included catalase enzyme with stop solution (this was treated as the “high control”). 12 $\mu$ L fresh 1mM H<sub>2</sub>O<sub>2</sub> was added into each well to start the reaction and incubated at room temperature for 30m. 10 $\mu$ L of stop solution was then added to each well. A 50 $\mu$ L developer containing 46 $\mu$ L assay buffer, 2 $\mu$ L OxiRed Probe, and 2 $\mu$ L HRP solution was prepared and added to samples. After 10m at room temperature, absorbance was measured at OD<sub>570nm</sub> using a Spectramax plate reader. Catalase activity was calculated by determining signal change:  $\Delta A = \text{absorbance of the high control} - \text{absorbance of each sample}$ . After plotting the standard curve, linear regression was used to convert  $\Delta A$  to nmol of H<sub>2</sub>O<sub>2</sub> decomposed by catalase in a 30m reaction (=B). Catalase activity could then be calculated as follows:

$$\text{Catalase activity} = \frac{B}{t} \times V \times \text{dilution factor}$$

where t = 30min, V = sample volume (mL), and one unit of catalase decomposes 1 $\mu$ mol of H<sub>2</sub>O<sub>2</sub> per minute at pH 4.5 at 25°C.
